# Supplementary material for: Synthesis, characterization, and catalytic performance in 1-butene cracking of ZSM-5 zeolites prepared with different cross-linked silicon species
Source: Royal Society of Chemistry journal article supplement (doi:10.1039/d5ra08160b), 2026-05-06
Supplement: d5ra08160b1.pdf [file d5ra08160b1.pdf]

## Supplementary Information (SI)

### Synthesis, Characterization, and Catalytic Performance in 1-Butene Cracking of ZSM-5 Zeolites Prepared with Different Cross-Linked Silicon Species

Zhen Chen<sup>1\*</sup>, Jingfei Geng<sup>1</sup>, Xiaofang Chen<sup>2</sup>, Na Li<sup>1</sup>, Richuan Rao<sup>1</sup>, Xiongzi

Dong<sup>1</sup>, Haiping Zou<sup>3,4</sup>, Weihang Ou<sup>1</sup>

*1. Pollution Control Research Institute of Pharmaceutical Wastewater, Hefei Normal*

*University, Hefei, Anhui, 230601, China*

*2. Ganzhou Vocational and Technical College, Ganzhou, 341003, China*

*3. Jiangxi Qianyue New Materials Co., Ltd., Ganzhou, 341003, China*

*4. Hejun College, Ganzhou 342600, China*

Corresponding author:

Zhen Chen (E-mail: 2992206151@qq.com)

## Preparation of S-1 zeolite

S-1 zeolite was synthesized via a hydrothermal method using tetraethyl orthosilicate (TEOS) as the silicon source and a 25 wt% aqueous solution of tetrapropylammonium hydroxide (TPAOH) as the structure-directing agent (SDA). The initial gel molar composition was 1.0 TEOS : 0.25 TPAOH : 18 H<sub>2</sub>O. The mixed sol system was accurately weighed and transferred to a constant-temperature water bath for sequential treatment: (1) pre-hydrolysis at 323 K for 30 min; (2) heating to 353 K to evaporate alcohol until the mass of the sol system stabilized (indicating complete alcohol removal); (3) transfer of the alcohol-free sol to a stainless-steel crystallization reactor lined with polytetrafluoroethylene (PTFE), followed by dynamic crystallization at 443 K for 48 h. After crystallization, the reactor was rapidly cooled to room temperature using a cold-water bath. The solid product was isolated by filtration, thoroughly washed with deionized water, and the filter cake was dried at 353 K overnight. Finally, calcination at 823 K for 6 h in a muffle furnace yielded the target S-1 zeolite.

## Characterization of samples

The infrared (IR) spectra were collected on Nicolet Nexus 670 FT-IR spectrometer at a spectral resolution of 2 cm<sup>-1</sup>. Pyridine adsorption coupled with IR spectroscopy (Py-IR) was performed using a Nicolet iS50 FT-IR spectrometer equipped with a vacuum cell to quantify Brønsted (BAS) and Lewis (LAS) acid sites on catalysts. A 13 mm-diameter self-supporting catalyst wafer was inserted into the cell, evacuated, and activated at 450°C for 1 h. For pyridine adsorption, the probe was dosed at 150°C to 0.1 mbar, adsorbed for 30 min, and physisorbed pyridine was removed under vacuum. BAS/LAS site densities were calculated from peak areas using extinction coefficients of 1.23 and 1.73 cm μmol<sup>-1</sup>.

<sup>29</sup>Si NMR spectra were recorded on a Bruker BioSpin GmbH spectrometer at 298.2 K. The spectra was obtained with a frequency of 119.24 MHz, a relaxation delay of 5 s and D<sub>2</sub>O as the solvent.

XRD was performed on a Rigaku Ultima IV X-ray diffractometer equipped with

CuK $\alpha$  radiation ( $\lambda= 1.5405 \text{ \AA}$ ) under the operation condition of 35 kV and 25 mA. Scanning electron microscopy (SEM) images were taken on a Hitachi S-4800 microscope.

X-ray photoelectron spectroscopy (XPS) measurements were conducted on a Thermo Scientific ESCALAB 250Xi spectrometer equipped with a monochromated X-ray source, operating at a constant power of 200 W. The acquired spectra were analyzed using the Casa XPS curve-fitting software, with the C1s peak at 284.8 eV serving as the binding energy reference. The measurement was performed with a 650  $\mu\text{m}$  monochromated X-ray spot. Depth profiling of heteroatom contents was carried out via argon ion sputtering at 5000 eV, where the etching rate was calibrated to 5 nm/min using a Ta<sub>2</sub>O<sub>5</sub> standard.

The pore structure characteristics of the zeolite were analyzed via nitrogen adsorption-desorption (BET) using an Autosorb-3B automatic adsorption instrument manufactured by Quantachrome Instruments, USA. Prior to testing, the zeolite powder was first compressed and sieved to obtain a 40–60 mesh fraction. Approximately 0.1 g of the sieved sample was loaded into a test tube and subjected to vacuum activation at 573 K for 3 hours to remove residual moisture and impurities. Immediately after activation, the sample was transferred to a liquid nitrogen bath maintained at 77 K for the adsorption-desorption measurements. The specific surface area was calculated using the Brunauer-Emmett-Teller (BET) model, while the external specific surface area and micropore volume were derived from the t-plot method.

Inductively coupled plasma atomic emission spectroscopy (ICP) analyses were conducted using a Thermo Fisher Scientific IRIS Intrepid II XSP spectrometer. Approximately 0.01 g of each sample was accurately weighed and digested with 0.3–0.4 g of 65 wt.% hydrofluoric acid (HF) solution. **Caution:** HF is highly corrosive and can cause severe, irreversible damage to human tissue; appropriate personal protective equipment (including acid-resistant gloves, lab coats, and goggles) must be worn, and all operations should be performed in a certified fume hood. After complete digestion, the resulting solution was diluted with 9 g of deionized water to adjust the concentration

to a range suitable for ICP detection.

Acidity was measured by temperature-programed desorption of ammonia (NH<sub>3</sub>-TPD) with a Micromeritics tp-5080 equipment equipped with a thermal conductivity detector (TCD). A 100-mg sample of 40-60 mesh particle size was first flushed with He gas flow (35 ml/min) at 550 °C for 2 h. The adsorption of NH<sub>3</sub> was carried out at 50 °C for 0.5 h. The catalyst was flushed with helium at 100 °C for 2 h to remove physisorbed NH<sub>3</sub> from the catalyst surface. The TPD profile was recorded at a heating rate of 5 °C/min from 100 °C to 550 °C.

<sup>29</sup>Si MAS NMR spectra were recorded on a VARIAN VNMRS-400WB spectrometer under a one-pulse condition. The spectra were obtained with a frequency of 79.43 MHz, a spinning rate of 3000 rps, and a recycling delay of 60 s. The chemical shift was referred to Q<sub>8</sub>M<sub>8</sub>[(CH<sub>3</sub>)<sub>3</sub>SiO]<sub>8</sub>-SiO<sub>12</sub>.

<sup>27</sup>Al MAS NMR and spectra were recorded with a frequency of 104.18 MHz, a spinning rate of 10.0 kHz, and a recycling delay of 4 s. KAl(SO<sub>4</sub>)<sub>2</sub>·12H<sub>2</sub>O was used as the reference for chemical shift.

## Calculation formula

The calculation formulas for 1-butene conversion rate, product selectivity, and product yield are shown in (1)~(3).

$$\begin{aligned} \text{conversion} &= \frac{F_{C_4H_8}^0 - F_{C_4H_8}^t}{F_{C_4H_8}^0} \times 100\% = \frac{F_{N_2}^0 \times \frac{1}{7.82} - F_{N_2}^t \times \frac{X_{C_4H_8}^t}{X_{N_2}^t}}{F_{N_2}^0 \times \frac{1}{7.82}} \times 100\% \\ &= 100\% - 7.82 \times \frac{X_{C_4H_8}^t}{X_{N_2}^t} \times 100\% \quad (F_{N_2}^0 = F_{N_2}^t) \end{aligned} \quad (1)$$

$$\text{mole selectivity}(C_xH_y) = \frac{X_{C_xH_y}^t}{\sum X_{C_iH_j}^t} \times 100\% \quad (2)$$

$$\text{mole yield} = \text{conversion} \times \text{mole selectivity} \quad (3)$$

In the equation,  $F_{C_4H_8}^0$ ,  $F_{C_4H_8}^t$ ,  $F_{N_2}^0$ , and  $F_{N_2}^t$ , representing 1-butene feed molar flow rate, 1-butene discharge molar flow rate, N<sub>2</sub> feed molar flow rate, and N<sub>2</sub> discharge molar flow rate, respectively, mol/min;  $X_{C_4H_8}^t$ ,  $X_{N_2}^t$ ,  $X_{C_xH_y}^t$  and  $X_{C_iH_j}^t$  are the 1-butene

mole fraction, N<sub>2</sub> mole fraction, desired product mole fraction, and any product mole fraction obtained by gas chromatography analysis, respectively, %.

**Table S1** The ratio of peak areas for Q<sup>1</sup>–Q<sup>3</sup> species to Q<sup>0</sup> species in the <sup>29</sup>Si NMR spectra of silicon species A and B

| Entry | Variable          | <sup>a</sup> A <sub>Q<sup>1-3</sup></sub> /A <sub>Q<sup>0</sup></sub> |                                                          |                                                        |                                                        |
|-------|-------------------|-----------------------------------------------------------------------|----------------------------------------------------------|--------------------------------------------------------|--------------------------------------------------------|
|       |                   | A <sub>Q<sup>1-d</sup></sub> /A <sub>Q<sup>0</sup></sub>              | A <sub>Q<sup>1-c</sup></sub> /A <sub>Q<sup>0</sup></sub> | A <sub>Q<sup>2</sup></sub> /A <sub>Q<sup>0</sup></sub> | A <sub>Q<sup>3</sup></sub> /A <sub>Q<sup>0</sup></sub> |
| 1     | Silicon species A | 0.56                                                                  | 0.12                                                     | <0.05                                                  | <0.05                                                  |
| 2     | Silicon species B | 0.72                                                                  | 0.45                                                     | 1.52                                                   | 0.23                                                   |

<sup>a</sup> Represented that the peak area ratio of Q<sup>1-3</sup> states to Q<sup>0</sup> states.

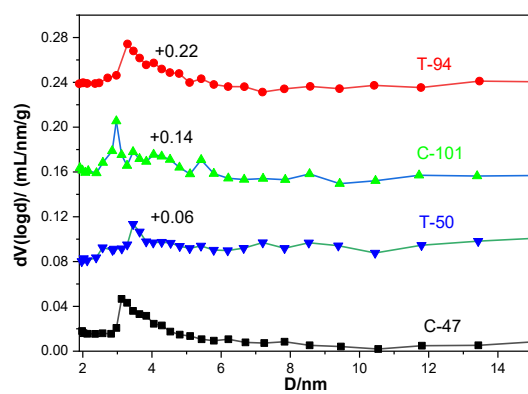

**Figure S1** Pore size distribution diagram of C-series and T-series ZSM-5 zeolites.

**Table S2** The properties of ZSM-5 zeolites

| Entry | Type  | <sup>a</sup> Si/Al | <sup>b</sup> S <sub>sur.</sub><br>(m <sup>2</sup> ·g <sup>-1</sup> ) | <sup>b</sup> S <sub>micro.</sub><br>(m <sup>2</sup> ·g <sup>-1</sup> ) | <sup>b</sup> S <sub>exter.</sub><br>(m <sup>2</sup> ·g <sup>-1</sup> ) | <sup>b</sup> V <sub>total</sub><br>(cm <sup>3</sup> ·g <sup>-1</sup> ) | <sup>b</sup> V <sub>micro.</sub><br>(cm <sup>3</sup> ·g <sup>-1</sup> ) | <sup>b</sup> V <sub>meso</sub><br>(cm <sup>3</sup> ·g <sup>-1</sup> ) | <sup>c</sup> Pore<br>Diameter<br>Dv(d)/nm |
|-------|-------|--------------------|----------------------------------------------------------------------|------------------------------------------------------------------------|------------------------------------------------------------------------|------------------------------------------------------------------------|-------------------------------------------------------------------------|-----------------------------------------------------------------------|-------------------------------------------|
| 1     | C-47  | 53                 | 380.6                                                                | 326.8                                                                  | 53.8                                                                   | 0.24                                                                   | 0.148                                                                   | 0.092                                                                 | 2.978                                     |
| 2     | T-50  | 105                | 403.5                                                                | 334.8                                                                  | 68.7                                                                   | 0.52                                                                   | 0.150                                                                   | 0.370                                                                 | 4.043                                     |
| 3     | C-101 | 94                 | 387.6                                                                | 338.4                                                                  | 49.2                                                                   | 0.23                                                                   | 0.152                                                                   | 0.078                                                                 | 2.974                                     |
| 4     | T-94  | 254                | 405.2                                                                | 322.8                                                                  | 83.1                                                                   | 0.48                                                                   | 0.146                                                                   | 0.334                                                                 | 3.527                                     |

<sup>a</sup> detected by XPS. <sup>b</sup> given by N<sub>2</sub> adsorption at 77 K and calculated from t-plot, S<sub>sur.</sub>, S<sub>micro.</sub>, S<sub>exter.</sub>, V<sub>total</sub>, V<sub>micro.</sub> and V<sub>meso</sub> respectively represent the surface area, micropore area, external specific surface area, total pore volume, micropore volume and mesoporous volume of the zeolite. <sup>c</sup> Pore diameter, given by nitrogen-sorption BJH measurement.

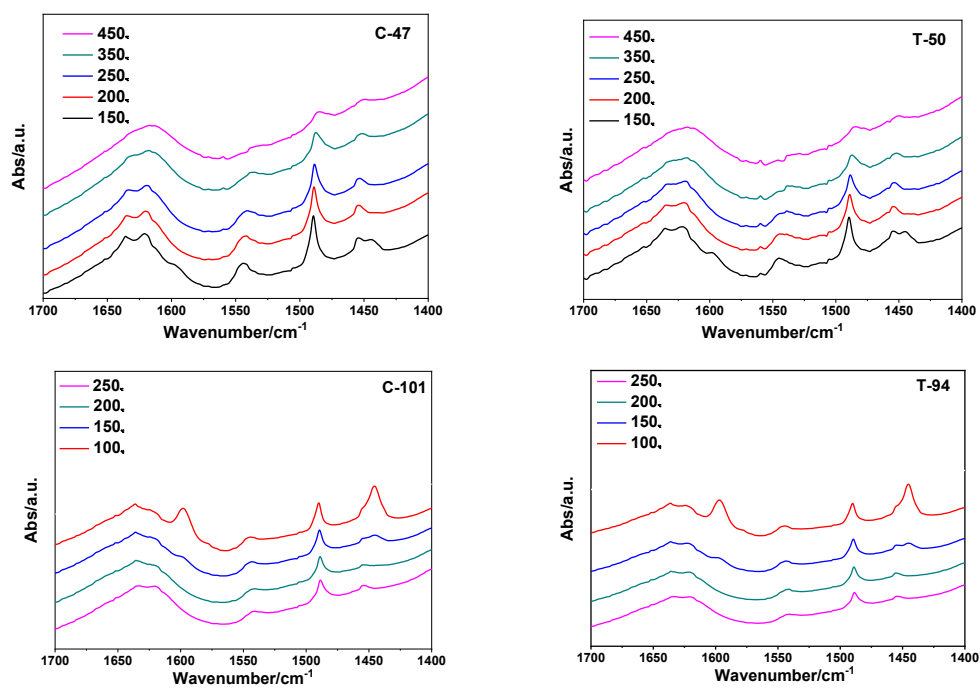

Figure S2 Py-IR spectra of C-series and T-series ZSM-5 zeolites.

**Table S3** The calculation of normalized area of ZSM-5 zeolites

| T/<br>°C | C-47              |                   |                                       |                       | T-50              |                   |                                       |                       |
|----------|-------------------|-------------------|---------------------------------------|-----------------------|-------------------|-------------------|---------------------------------------|-----------------------|
|          | S <sub>1880</sub> | S <sub>1540</sub> | S <sub>1540</sub> / S <sub>1880</sub> | Normalization<br>area | S <sub>1880</sub> | S <sub>1540</sub> | S <sub>1540</sub> / S <sub>1880</sub> | Normalization<br>area |
| 150      | 35.819            | 2.866             | 0.080                                 | 1.000                 | 38.925            | 2.336             | 0.060                                 | 1.000                 |
| 200      | 36.033            | 2.525             | 0.070                                 | 0.876                 | 38.925            | 2.146             | 0.055                                 | 0.919                 |
| 250      | 35.623            | 2.086             | 0.059                                 | 0.732                 | 38.089            | 1.879             | 0.049                                 | 0.822                 |
| 350      | 35.769            | 1.133             | 0.032                                 | 0.396                 | 37.403            | 1.261             | 0.034                                 | 0.562                 |
| 450      | 36.354            | 0.000             | 0.000                                 | 0                     | 38.556            | 0.583             | 0.015                                 | 0.252                 |

**Table S4** The calculation of normalized area of ZSM-5 zeolites

| T/<br>°C | C-101             |                   |                                       |                       | T-94              |                   |                                       |                       |
|----------|-------------------|-------------------|---------------------------------------|-----------------------|-------------------|-------------------|---------------------------------------|-----------------------|
|          | S <sub>1880</sub> | S <sub>1540</sub> | S <sub>1540</sub> / S <sub>1880</sub> | Normalization<br>area | S <sub>1880</sub> | S <sub>1540</sub> | S <sub>1540</sub> / S <sub>1880</sub> | Normalization<br>area |
| 100      | 47.066            | 1.459             | 0.031                                 | 1.000                 | 44.597            | 1.739             | 0.039                                 | 1.000                 |
| 150      | 46.251            | 1.232             | 0.027                                 | 0.859                 | 44.080            | 1.649             | 0.036                                 | 0.959                 |
| 200      | 46.249            | 0.823             | 0.026                                 | 0.574                 | 44.193            | 1.424             | 0.034                                 | 0.826                 |
| 250      | 46.808            | 0.705             | 0.020                                 | 0.486                 | 43.808            | 1.017             | 0.027                                 | 0.595                 |
